# Supplementary material for: Z-effect reversal in carboxylic acid associates
Source: Royal Society of Chemistry journal article supplement (doi:10.1039/c6cc01305h), 2016-01-01
Supplement: c6cc01305h1.pdf [file c6cc01305h1.pdf]

*Supplementary information to*

## **Z-Effect Reversal in Carboxylic Acid Associates**

*M. G. Medvedev, I. S. Bushmarinov, K. A. Lyssenko*

### **Table of Contents**

|                                                   |    |
|---------------------------------------------------|----|
| CSD search details .....                          | 2  |
| CSD statistics .....                              | 3  |
| Computational methods and additional tables ..... | 4  |
| Effect of secondary interactions .....            | 6  |
| Source function analysis .....                    | 6  |
| ANOVA analysis .....                              | 7  |
| Summaries of linear fits .....                    | 7  |
| Diagnostic plots for the best fit .....           | 11 |
| LRSE in human insulin.....                        | 15 |
| OPLS-aa force field evaluation for LRSE.....      | 16 |
| Molecular graphs .....                            | 17 |
| References.....                                   | 26 |
| Data tables .....                                 | 27 |

### **CSD search details**

Data was extracted from the CSD with the CCDC ConQuest<sup>1</sup>. Unless otherwise specified, the search was limited by R value  $< 7.5\%$ , and only *inter*-molecular hydrogen bonds were considered. Data visualization and analysis were performed using R<sup>2</sup> and CCDC Mercury<sup>3</sup>.

Hydrogen bonds were defined during the searches as having O...X distance shorter than the sum of O and X van der Waals radii, and O-H...X angle larger than  $150^\circ$ . O=C-O-X torsions of  $0\text{--}40^\circ$  are considered *cis*, and  $140\text{--}180^\circ$  were denoted as *trans*.

## CSD statistics

**Table S1. The CSD statistics (median and quartiles) for COOH...X fragments after exclusion of COOH dimers**

| X  | O=C-O-H<br>torsion | Count | %    | X...O, Å |       |       |
|----|--------------------|-------|------|----------|-------|-------|
|    |                    |       |      | median   | Q1    | Q3    |
| N  | <i>cis</i>         | 3351  | 99.4 | 2.652    | 2.611 | 2.689 |
|    | <i>trans</i>       | 21    | 0.6  | 2.654    | 2.621 | 2.690 |
| O  | <i>cis</i>         | 10952 | 96.0 | 2.596    | 2.548 | 2.646 |
|    | <i>trans</i>       | 461   | 4.0  | 2.566    | 2.498 | 2.628 |
| F  | <i>cis</i>         | 65    | 100  | 2.581    | 2.476 | 2.628 |
| S  | <i>cis</i>         | 19    | 100  | 3.136    | 3.101 | 3.195 |
| Cl | <i>cis</i>         | 387   | 97.5 | 3.006    | 2.975 | 3.047 |
|    | <i>trans</i>       | 10    | 2.5  | 2.976    | 2.959 | 3.036 |
| Br | <i>cis</i>         | 71    | 98.6 | 3.141    | 3.115 | 3.202 |
|    | <i>trans</i>       | 1     | 1.4  | 3.183    | 3.183 | 3.183 |
| I  | <i>cis</i>         | 7     | 100  | 3.391    | 3.370 | 3.421 |

**Table S2. Finite mixture modeling of do...o.**

| Conformation | Component | $\lambda$ | $\mu$  | $\sigma$ | Estimated count |
|--------------|-----------|-----------|--------|----------|-----------------|
| <i>trans</i> | 1         | 0.1847    | 2.4621 | 0.0195   | 85              |
|              | 2         | 0.6473    | 2.5743 | 0.0593   | 298             |
|              | 3         | 0.1680    | 2.7109 | 0.1232   | 77              |
| <i>cis</i>   | 1         | 0.041     | 2.463  | 0.017    | 444             |
|              | 2         | 0.913     | 2.598  | 0.067    | 9997            |
|              | 3         | 0.047     | 2.722  | 0.110    | 512             |

### Computational methods and additional tables

Geometries of all complexes included in this study were optimized at the uM11<sup>4</sup>/aug-cc-pV(T+d)Z<sup>5</sup> level of theory. M11 method has been chosen for its best performance for weak interactions among other popular DFT functionals and MP2 method<sup>6</sup>. All the same calculations with the uMP2 method and the same basis set were also carried out, providing quantitatively equal results (deviations in  $R^2$  values for all discussed correlations did not exceed 0.02). Basis set aug-cc-pV(T+d)Z was used in spherical harmonics form, differing from aug-cc-pVTZ<sup>7-9</sup> by one extra tight d-function for elements Na-Ar, which is known to improve accuracy<sup>5,10</sup>. The calculations have been performed using the program package GAMESS-US<sup>11,12</sup> (version 20130501R1). For all complexes, except two with bromine, we have used an unpublished large grid by Curtis Janssen as implemented in GAMESS-US (JANS=2 keyword). It uses 155 radial points in the Euler-MacLaurin quadrature for all atoms, and prunes from a Lebedev grid whose largest size is 974, thus using about 71000 grid points/atom. For complexes with bromine we used even larger grid: 330 radial points for all atoms and 1730 angular points in the Lebedev grid. Four complexes (“non-alt” Z-conformers with formaldehyde and acetaldehyde and “non-alt” E-conformers with NO<sub>3</sub><sup>-</sup> and BF<sub>4</sub><sup>-</sup> anions) were optimized at  $C_s$  symmetry to avoid formation of additional bonds with acid molecule. All of them were then bent and reoptimized at  $C_1$  symmetry to give multiple-bonded “alt” structures. All other calculations have been carried out at  $C_1$  symmetry. The harmonic vibrational frequency calculations using the same method as for the geometry optimization were used to ascertain the presence of local minima. The “atoms-in-molecules” (AIM) analysis was performed at the same level of theory. The calculation of AIM properties and visualization of results was done using the AIMALL<sup>13</sup> program.

**Table S3. Summary of changes in total energy, CH<sub>3</sub>COOH QTAIM charges<sup>[a]</sup> and O...X distance upon transition from *cis* to *trans* conformation of hydrogen-bonded acetic acid with various acceptors (CH<sub>3</sub>COOH...X), sorted by decrease of conformer energy difference, MP2/aug-cc-pV(T+d)Z calculations.**

| H-bond acceptor                   | $\Delta E_Z$ ,<br>kcal·mol <sup>-1</sup> | $\Delta q(\Omega) \cdot 10^2, e$ |      |      |      |                 | $\Delta d_{O\dots X}, \text{\AA}$ |
|-----------------------------------|------------------------------------------|----------------------------------|------|------|------|-----------------|-----------------------------------|
|                                   |                                          | H                                | O1   | C    | O2   | CH <sub>3</sub> |                                   |
| H <sub>2</sub> O                  | -7.70                                    | 1.7                              | -0.8 | -0.9 | -2.8 | 4.7             | -0.086                            |
| O=CH <sub>2</sub> <sup>[b]</sup>  | -6.51                                    | 2.0                              | -1.2 | -0.1 | -3.1 | 2.9             | 0.002                             |
| OMe <sub>2</sub>                  | -6.12                                    | 0.9                              | -1.5 | -1.3 | -2.6 | 4.1             | -0.040                            |
| O=C(H)Me                          | -6.09                                    | 1.9                              | -1.2 | -0.2 | -2.9 | 2.6             | -0.011                            |
| CF <sub>4</sub>                   | -5.50                                    | 1.5                              | -1.7 | -1.5 | -1.9 | 4.0             | 0.014                             |
| triazole                          | -5.35                                    | 1.5                              | -1.2 | 0.0  | -2.6 | 2.2             | -0.047                            |
| <b>none</b>                       | -5.23                                    | 1.5                              | -1.9 | -1.3 | -2.3 | 4.1             | 0.000                             |
| O=CMe <sub>2</sub> <sup>[b]</sup> | -4.37                                    | 1.6                              | -0.5 | 0.2  | -2.6 | 2.1             | -0.001                            |
| N≡CH                              | -3.70                                    | 1.2                              | -1.3 | -0.9 | -1.9 | 2.9             | -0.021                            |
| O=CH <sub>2</sub>                 | -2.85                                    | 1.1                              | -1.2 | -0.8 | -1.2 | 2.3             | 0.013                             |
| O=CMe <sub>2</sub>                | -2.01                                    | 1.2                              | -1.1 | -0.4 | -0.8 | 1.5             | 0.010                             |
| BF <sub>4</sub> <sup>-</sup>      | 2.56                                     | 1.5                              | -1.2 | 2.8  | 0.8  | -4.1            | -0.030                            |
| NO <sub>3</sub> <sup>-</sup>      | 3.16                                     | 0.8                              | -1.0 | 2.8  | 0.9  | -4.4            | -0.045                            |
| N <sub>3</sub> <sup>-</sup>       | 4.24                                     | 0.5                              | -0.7 | 3.2  | 1.2  | -4.5            | -0.040                            |
| NCO <sup>-</sup>                  | 4.24                                     | 0.4                              | -0.7 | 3.2  | 1.2  | -4.7            | -0.048                            |
| BF <sub>4</sub> <sup>-[c]</sup>   | 5.05                                     | 2.0                              | -0.8 | 4.4  | 1.2  | -7.0            | -0.038                            |
| NO <sub>3</sub> <sup>-[c]</sup>   | 5.06                                     | 1.0                              | -0.6 | 3.4  | 1.1  | -5.4            | -0.041                            |
| Br <sup>-</sup>                   | 5.25                                     | 1.1                              | -1.2 | 3.8  | 1.7  | -4.4            | -0.036                            |
| Cl <sup>-</sup>                   | 5.45                                     | 0.7                              | -0.9 | 3.8  | 1.7  | -5.1            | -0.042                            |
| N <sub>3</sub> <sup>-[c]</sup>    | 5.64                                     | 1.1                              | -1.1 | 4.2  | 1.2  | -5.8            | -0.056                            |

[a] for O-H hydrogen (H), O-H oxygen (O1), C=O carbon (C), C=O oxygen (O2) and methyl group (CH<sub>3</sub>)

[b] Alternative *cis* conformation

[c] Alternative *trans* conformation

**Table S4. The energies of *cis* and *trans* conformations of selected free acids and their RCOOH...NCO<sup>-</sup> complexes.**

| Acid                                 | Energies, hartree          |                              |                                       |                                         | $\Delta E$ , kcal/mol |                   |
|--------------------------------------|----------------------------|------------------------------|---------------------------------------|-----------------------------------------|-----------------------|-------------------|
|                                      | <i>cis</i> <sub>free</sub> | <i>trans</i> <sub>free</sub> | <i>cis</i> <sub>NCO<sup>-</sup></sub> | <i>trans</i> <sub>NCO<sup>-</sup></sub> | $\Delta E_{free}$     | $\Delta E_{NCO-}$ |
| HCOOH                                | -189.7801                  | -189.7733                    | -357.9608                             | -357.9679                               | -4.29                 | 4.45              |
| CH <sub>3</sub> COOH <sup>a</sup>    | -                          | -                            | -                                     | -                                       | -5.09                 | 4.73              |
| EtCOOH                               | -268.3971                  | -268.3894                    | -436.5734                             | -436.5806                               | -4.81                 | 4.56              |
| PrCOOH                               | -307.6981                  | -307.6905                    | -475.8746                             | -475.8817                               | -4.77                 | 4.45              |
| H <sub>2</sub> C=CHCOOH              | -267.1640                  | -267.1555                    | -435.3423                             | -435.3489                               | -5.33                 | 4.09              |
| H <sub>2</sub> NCH <sub>2</sub> COOH | -284.4453                  | -284.4376                    | -452.6260                             | -452.6319                               | -4.81                 | 3.69              |

<sup>a</sup>see Table S5 for energies

### Effect of secondary interactions

Some deviations from linear fit in the analyzed series are the consequence of weak secondary interactions. The total energy of such interactions can be successfully<sup>14</sup> quantified using Espinosa-Lecomte-Molins correlation<sup>15-17</sup> by summing their “contact energy”

$$E_{cont}(\text{hartree}) \approx -0.5 \times V(\mathbf{r}_{BCP})$$

where  $V(\mathbf{r})$  is local potential energy density and  $\mathbf{r}_{BCP}$  are the coordinates of the bond critical point corresponding to the weak interaction. Indeed, if we exclude the complexes with  $\sum E_{cont} > 10 \text{ kJ} \cdot \text{mol}^{-1}$ , the  $R^2$  exceeds 0.97 for all fits to individual  $\Delta q(\Omega)$ . The fit to both  $\Delta q(\Omega)_{CH_3}$  and  $\Delta q(\Omega)_{O_2}$ , however, does not improve.

The dipole-dipole interaction, on the other hand, does not seem to play a major role since both “trans” and “alt-trans” structures of azide anion complex (Table 1 in the main text) have very similar  $\Delta q(\Omega)$  and  $\Delta E$ .

### Source function analysis

The analysis of the source function proposed by Gatti et. al.<sup>18</sup> allows to quantify the influence of each atom in a system in determining the amount of electron density at a given point. In our system it provides insight into the stereoelectronic contributions to the C=O bond critical point (BCP). On one hand, in the *cis* conformation the contribution of the O-H oxygen

remains nearly constant, allowing to associate it with the effect of the lone pair. On the other hand, in the *trans* conformation it strongly correlates with  $\Delta E_Z$ . In other words, strong hydrogen bonds increase the contribution of O-H oxygen atomic source to the C=O bond critical point in *trans* conformation, making it similar to the contribution in *cis* conformer. These facts support the hypothesis that O-H group involved in a strong hydrogen bond can serve as a “surrogate” lone pair acting upon the C=O bond. With  $R^2$  of 0.80, the relation is, however, only semi-quantitative.

### **ANOVA analysis**

#### **Summaries of linear fits**

Below are provided the results of ANOVA analysis for all discussed relationships in the data, as implemented in R.<sup>2</sup> All relationships are statistically significant, but only for the fit against  $\Delta q(\Omega)_{CH_3}$  together with  $\Delta q(\Omega)_{O_2}$  the residuals are close to normality. The data fields and variables are self-descriptive, delta\_energy is  $\Delta E_Z$ .

$\Delta E_Z$  against total charge:

```
> summary(lm(delta_energy ~ x0_q_total, data = fullv))
```

Residuals:

| Min     | 1Q      | Median  | 3Q     | Max    |
|---------|---------|---------|--------|--------|
| -3.2981 | -1.2409 | -0.2667 | 1.0834 | 3.3353 |

Coefficients:

|             | Estimate | Std. Error | t value | Pr(> t )     |
|-------------|----------|------------|---------|--------------|
| (Intercept) | -4.8324  | 0.4963     | -9.736  | 8.08e-09 *** |
| x0_q_total  | -10.0746 | 0.7584     | -13.285 | 4.56e-11 *** |

---

Signif. codes: 0 '\*\*\*' 0.001 '\*\*' 0.01 '\*' 0.05 '.' 0.1 ' ' 1

Residual standard error: 1.719 on 19 degrees of freedom  
 Multiple R-squared: 0.9028, Adjusted R-squared: 0.8977  
 F-statistic: 176.5 on 1 and 19 DF, p-value: 4.565e-11

$\Delta E_Z$  against  $\Delta q(\Omega)_{CH_3}$ :

```
> summary(lm(delta_energy ~ delta_q_CH3, data = fullv))
```

Call:

```
lm(formula = delta_energy ~ delta_q_CH3, data = fullv)
```

Residuals:

| Min      | 1Q       | Median  | 3Q      | Max     |
|----------|----------|---------|---------|---------|
| -2.26254 | -0.64786 | 0.02242 | 1.13308 | 1.52799 |

Coefficients:

|             | Estimate  | Std. Error | t value | Pr(> t )     |
|-------------|-----------|------------|---------|--------------|
| (Intercept) | -1.0881   | 0.2663     | -4.086  | 0.00063 ***  |
| delta_q_CH3 | -125.3564 | 6.4837     | -19.334 | 5.89e-14 *** |

---

Signif. codes: 0 '\*\*\*' 0.001 '\*\*' 0.01 '\*' 0.05 '.' 0.1 ' ' 1

Residual standard error: 1.213 on 19 degrees of freedom  
 Multiple R-squared: 0.9516, Adjusted R-squared: 0.9491  
 F-statistic: 373.8 on 1 and 19 DF, p-value: 5.889e-14

$\Delta E_Z$  against  $\Delta q(\Omega)_{O_2}$ :

```
> summary(lm(delta_energy ~ delta_q_O2, data = fullv))
```

Call:

```
lm(formula = delta_energy ~ delta_q_O2, data = fullv)
```

Residuals:

| Min     | 1Q      | Median  | 3Q     | Max    |
|---------|---------|---------|--------|--------|
| -1.9519 | -0.2657 | -0.1209 | 0.8016 | 1.8028 |

Coefficients:

|             | Estimate | Std. Error | t value | Pr(> t )     |
|-------------|----------|------------|---------|--------------|
| (Intercept) | 1.9933   | 0.2502     | 7.967   | 1.78e-07 *** |
| delta_q_O2  | 301.8277 | 13.1749    | 22.909  | 2.66e-15 *** |

---



Signif. codes: 0 '\*\*\*' 0.001 '\*\*' 0.01 '\*' 0.05 '.' 0.1 ' ' 1

Residual standard error: 1.031 on 19 degrees of freedom  
Multiple R-squared: 0.9651, Adjusted R-squared: 0.9632  
F-statistic: 524.8 on 1 and 19 DF, p-value: 2.661e-15

$\Delta E_Z$  against  $\Delta q(\Omega)_C$ :

```
> summary(lm(delta_energy ~ delta_q_C, data = fullv))
```

Call:

```
lm(formula = delta_energy ~ delta_q_C, data = fullv)
```

Residuals:

| Min    | 1Q     | Median | 3Q    | Max   |
|--------|--------|--------|-------|-------|
| -3.185 | -0.512 | 0.107  | 1.157 | 2.373 |

Coefficients:

|             | Estimate | Std. Error | t value | Pr(> t )     |
|-------------|----------|------------|---------|--------------|
| (Intercept) | -2.9648  | 0.4256     | -6.966  | 1.23e-06 *** |
| delta_q_C   | 228.7436 | 17.5581    | 13.028  | 6.39e-11 *** |

---

Signif. codes: 0 '\*\*\*' 0.001 '\*\*' 0.01 '\*' 0.05 '.' 0.1 ' ' 1

Residual standard error: 1.75 on 19 degrees of freedom  
Multiple R-squared: 0.8993, Adjusted R-squared: 0.894  
F-statistic: 169.7 on 1 and 19 DF, p-value: 6.388e-11

$\Delta E_Z$  against  $\Delta q(\Omega)_{O_2}$  together with  $\Delta q(\Omega)_{CH_3}$ :

```
> summary(lm(delta_energy ~ delta_q_CH3 + delta_q_O2, data = fullv))
```

Call:

```
lm(formula = delta_energy ~ delta_q_CH3 + delta_q_O2, data = fullv)
```

Residuals:

| Min      | 1Q       | Median  | 3Q      | Max     |
|----------|----------|---------|---------|---------|
| -1.40172 | -0.31566 | 0.03239 | 0.30420 | 1.13288 |

Coefficients:

|             | Estimate | Std. Error | t value | Pr(> t )     |
|-------------|----------|------------|---------|--------------|
| (Intercept) | 0.6563   | 0.2666     | 2.462   | 0.0241 *     |
| delta_q_CH3 | -57.5170 | 9.5392     | -6.030  | 1.06e-05 *** |
| delta_q_O2  | 172.5765 | 22.8076    | 7.567   | 5.37e-07 *** |

---

Signif. codes: 0 '\*\*\*' 0.001 '\*\*' 0.01 '\*' 0.05 '.' 0.1 ' ' 1

Residual standard error: 0.6094 on 18 degrees of freedom  
Multiple R-squared: 0.9884, Adjusted R-squared: 0.9871  
F-statistic: 768.9 on 2 and 18 DF, p-value: < 2.2e-16

$\Delta E_Z$  against  $\Delta d_{C=O}$ :

```
> summary(lm(delta_energy ~ delta_CO_len, data=fullv))
```

Call:

```
lm(formula = delta_energy ~ delta_CO_len, data = fullv)
```

```
Residuals:
```

```
      Min       1Q   Median       3Q      Max
-2.6587 -1.1334  0.1862  1.0334  2.7024
```

```
Coefficients:
```

```
              Estimate Std. Error t value Pr(>|t|)
(Intercept)    4.0198     0.4826   8.329 9.16e-08 ***
delta_CO_len  -903.1213    64.5085 -14.000 1.84e-11 ***
---
```

```
Signif. codes:  0 '***' 0.001 '**' 0.01 '*' 0.05 '.' 0.1 ' ' 1
```

```
Residual standard error: 1.639 on 19 degrees of freedom
Multiple R-squared:  0.9116,    Adjusted R-squared:  0.907
F-statistic:  196 on 1 and 19 DF,  p-value: 1.84e-11
```

$\Delta d_{C-C}$  against  $\Delta d_{C=O}$ :

```
> summary(lm(delta_CC_len ~ delta_CO_len, data=fullv))
```

```
Call:
```

```
lm(formula = delta_CC_len ~ delta_CO_len, data = fullv)
```

```
Residuals:
```

```
      Min       1Q   Median       3Q      Max
-0.005648 -0.003476  0.001378  0.002337  0.003910
```

```
Coefficients:
```

```
              Estimate Std. Error t value Pr(>|t|)
(Intercept)    0.002445    0.001007   2.428  0.0253 *
delta_CO_len  -1.186977    0.134611  -8.818 3.83e-08 ***
---
```

```
Signif. codes:  0 '***' 0.001 '**' 0.01 '*' 0.05 '.' 0.1 ' ' 1
```

```
Residual standard error: 0.003421 on 19 degrees of freedom
Multiple R-squared:  0.8036,    Adjusted R-squared:  0.7933
F-statistic:  77.75 on 1 and 19 DF,  p-value: 3.834e-08
```

## Diagnostic plots for the best fit

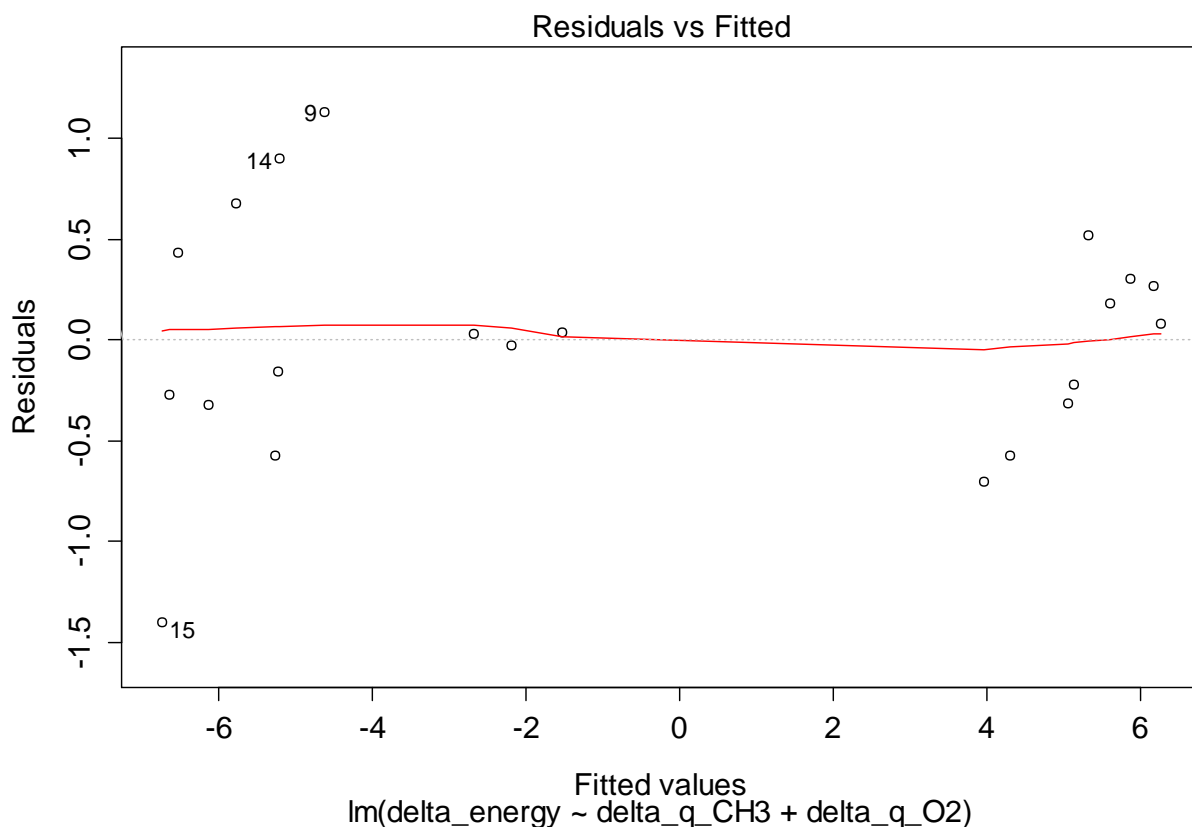

**Figure S1. Residuals plot for the relationship  $\Delta E_Z$  ( $\text{kcal} \cdot \text{mol}^{-1}$ )  $\approx 0.7 - 58\Delta q(\Omega)_{CH_3} + 173\Delta q(\Omega)_{O_2}$ . Numbers on plot denote three furthest outlying data points and correspond to row numbers in Table .**

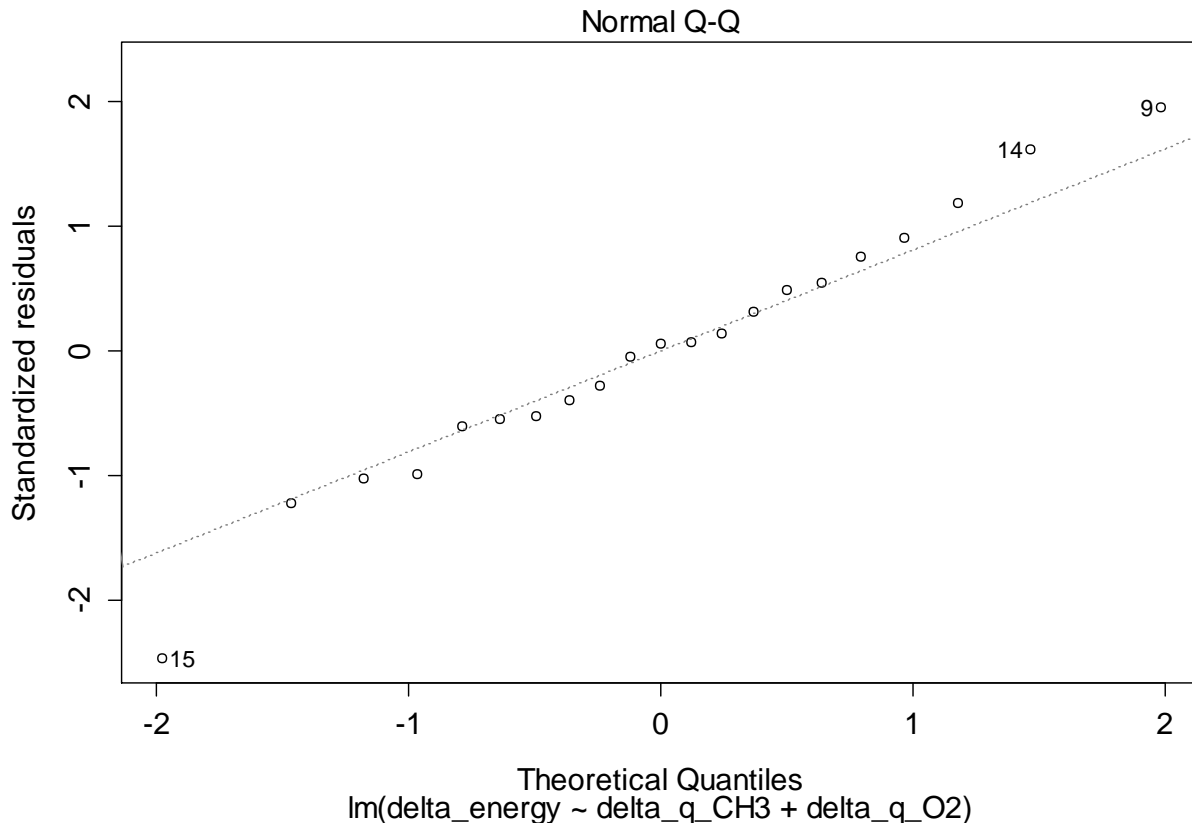

**Figure S2. Q-Q plot for the relationship  $\Delta E_Z$  ( $\text{kcal} \cdot \text{mol}^{-1}$ )  $\approx 0.7 - 58\Delta q(\Omega)_{CH_3} + 173\Delta q(\Omega)_{O_2}$ . Numbers on plot denote three furthest outlying data points and correspond to row numbers in Table .**

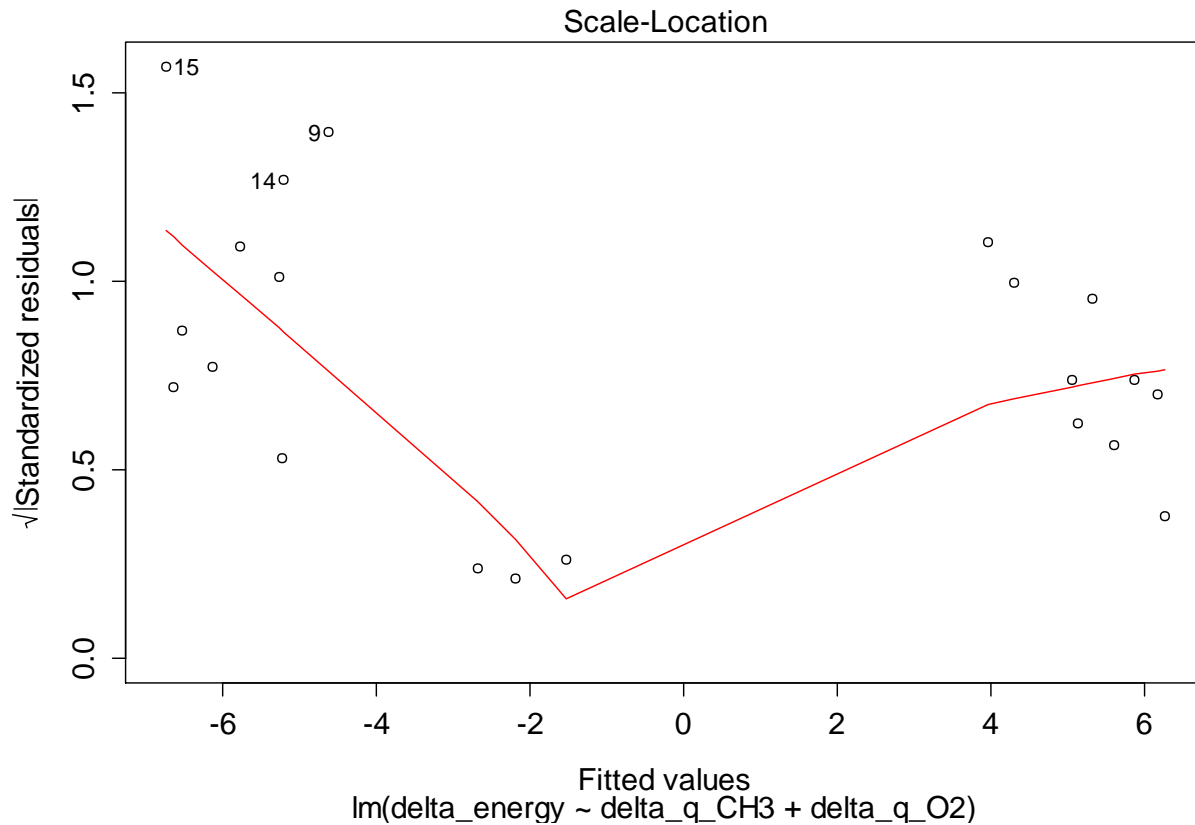

**Figure S3. Scale-location plot for the relationship  $\Delta E_Z$  ( $\text{kcal} \cdot \text{mol}^{-1}$ )  $\approx 0.7 - 58\Delta q(\Omega)_{CH_3} + 173\Delta q(\Omega)_{O_2}$ . Numbers on plot denote three furthest outlying data points and correspond to row numbers in Table .**

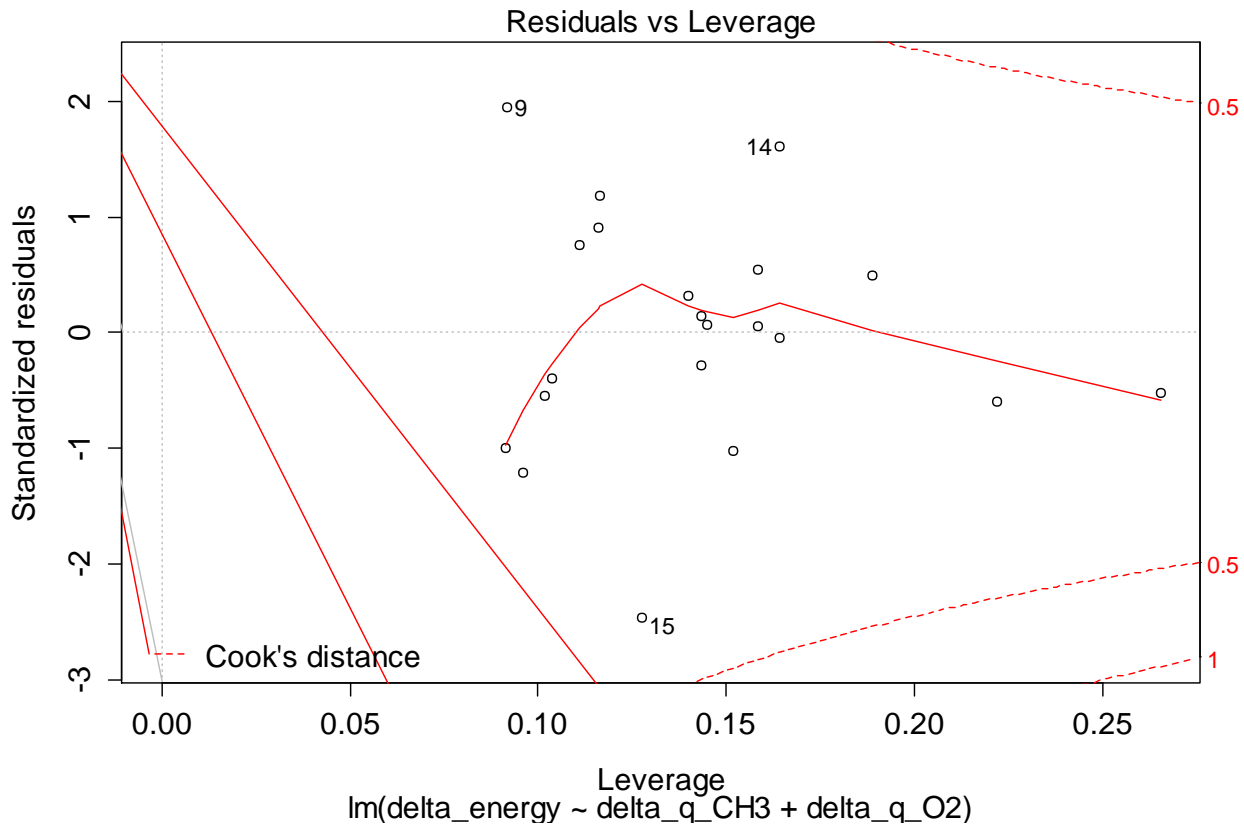

**Figure S4. Residuals vs leverage plot for the relationship  $\Delta E_Z$  (kcal · mol<sup>-1</sup>)  $\approx$  0.7 – 58 $\Delta q(\Omega)_{CH_3}$  + 173 $\Delta q(\Omega)_{O_2}$ . Numbers on plot denote three furthest outlying data points and correspond to row numbers in Table .**

**LRSE in human insulin**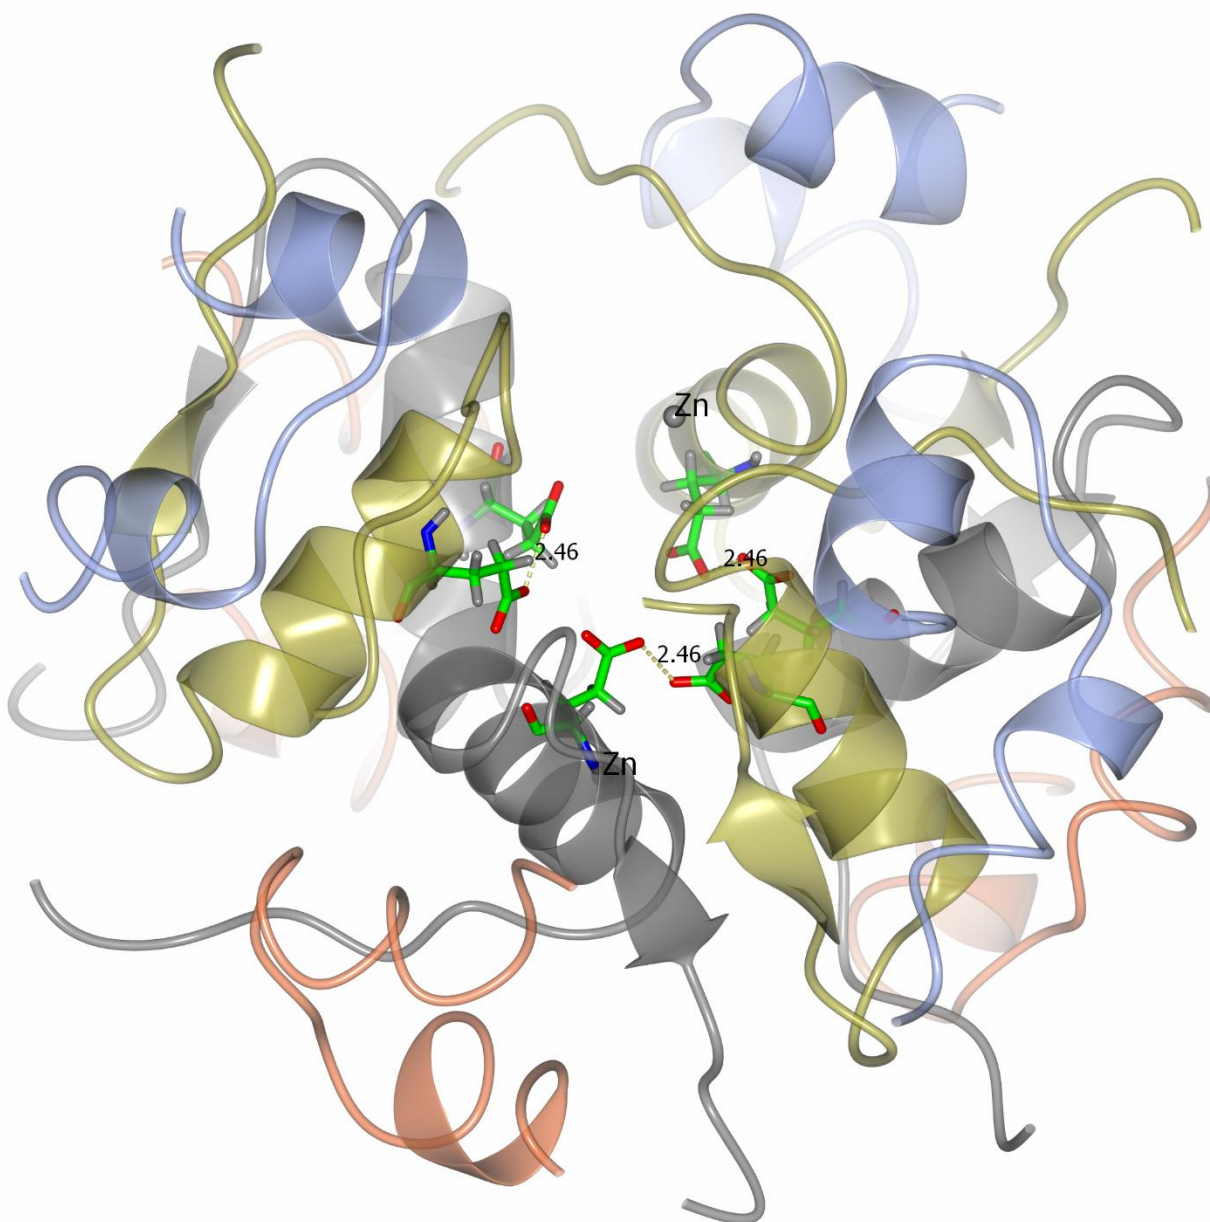

**Figure S5. Contacting GluB13 residues in the insulin T<sub>6</sub> hexamer. O<sup>ε2</sup>...O<sup>ε2</sup> distances are marked on the image. Protein chains are colored by symmetry equivalence.**

### **OPLS-aa force field evaluation for LRSE**

Two butyric acid - butyrate associates, modeling the interaction of Glu13B side chains, were optimized with uM11/aug-cc-pV(T+d)Z method (GAMESS-US) and OPLS-aa force field (TINKER<sup>20</sup>): trans-trans (as observed in T<sub>6</sub> insulin) and cis-cis geometries. In the case of trans-trans conformer in OPLS-aa, the dihedral C...O(H)...O...C and valence O(H)...O...C angles were restrained to 180 and 120 degrees respectively to preserve the correct dimer geometry, which was significantly altered otherwise. While the M11 calculation predicts trans-trans form to be 4.5 kcal/mol more stable than cis, OPLS-aa predicts them to have identical energies.



## Molecular graphs

cis

trans

 $\text{H}_2\text{O}$ 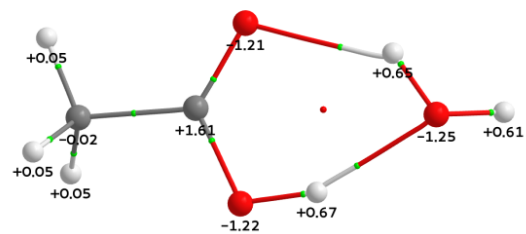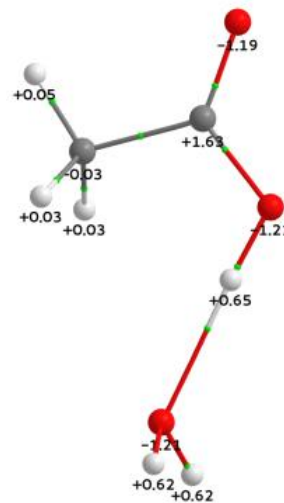 $\text{O}=\text{CH}_2^{[a]}$ 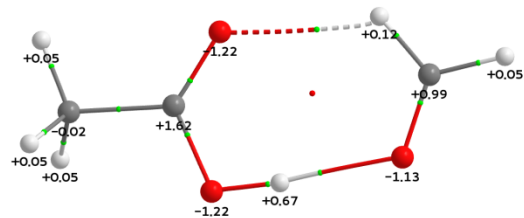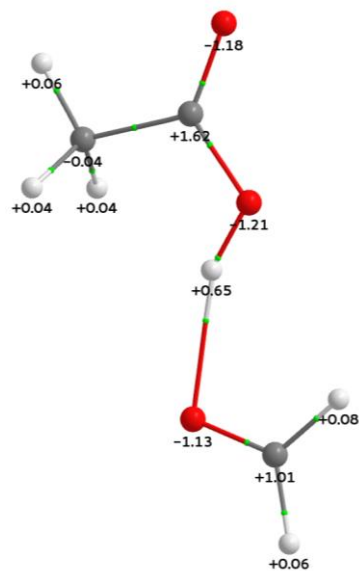

O=C(H)Me  
[a]

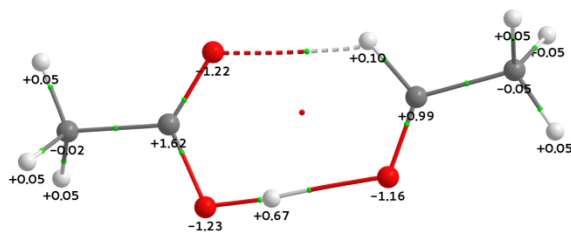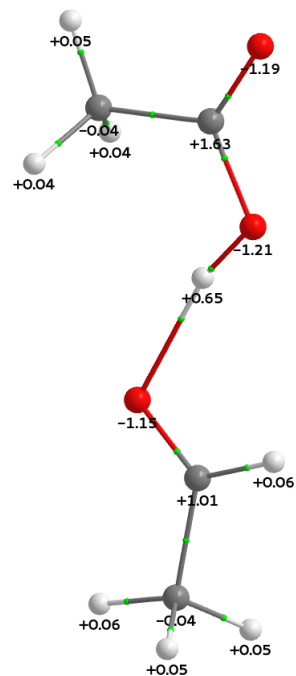

OMe<sub>2</sub>

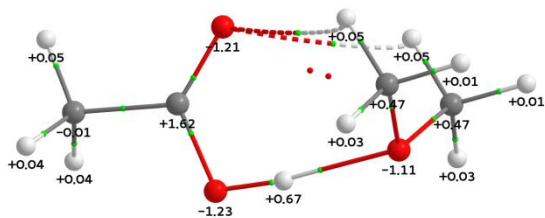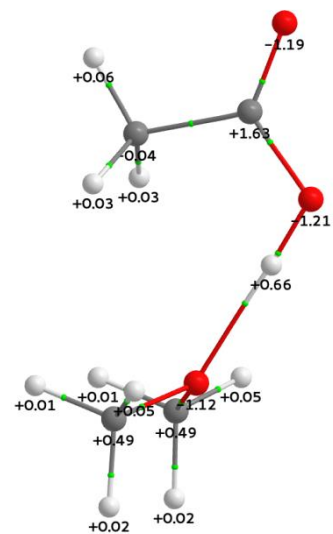

CF<sub>4</sub>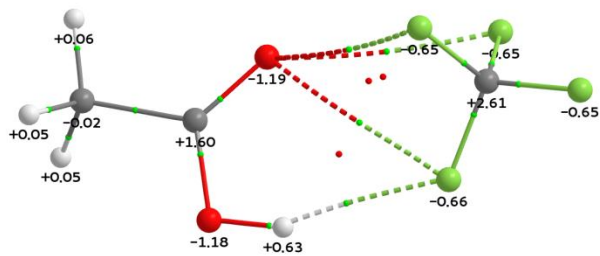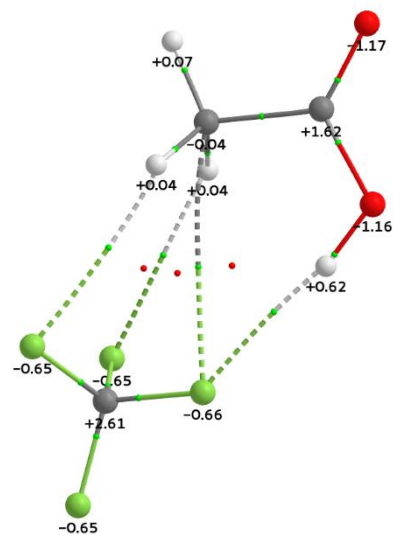

triazole

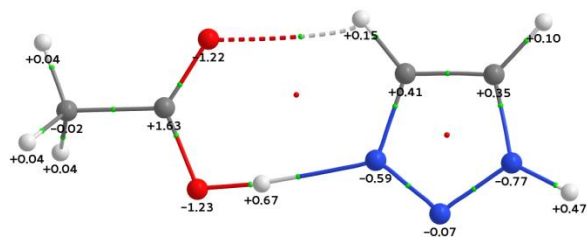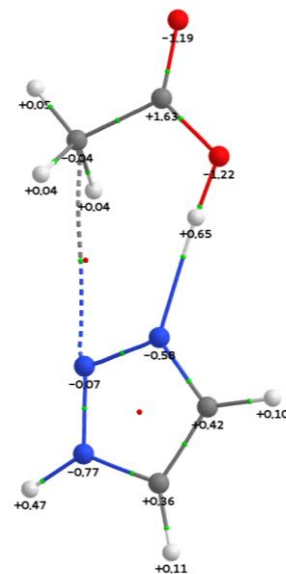

none

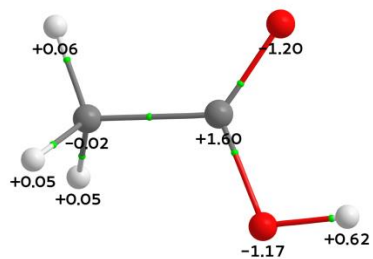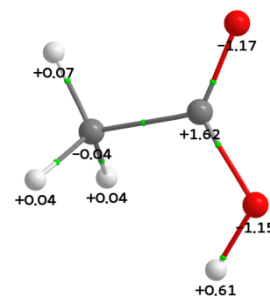

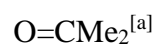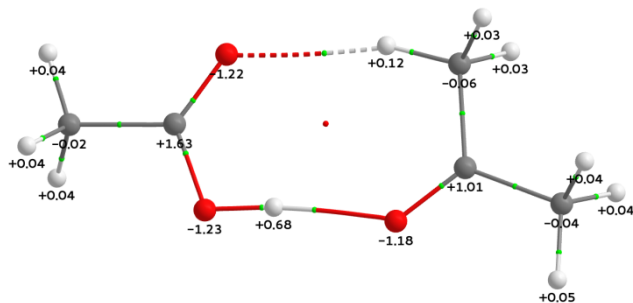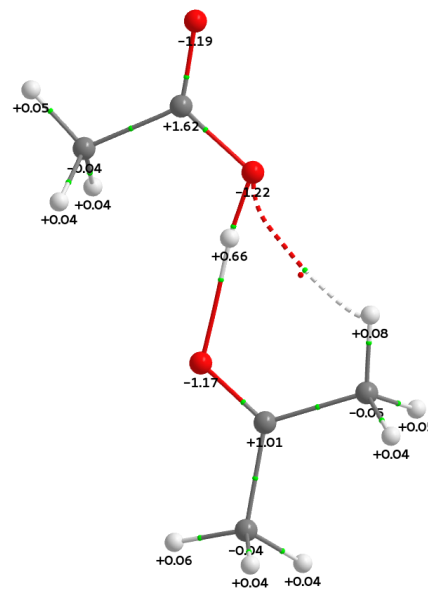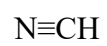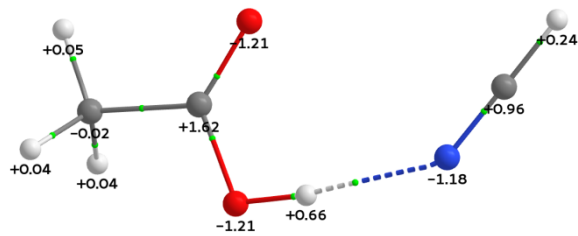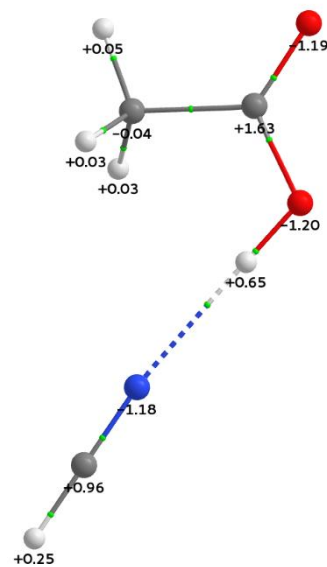

$\text{O}=\text{CH}_2$ 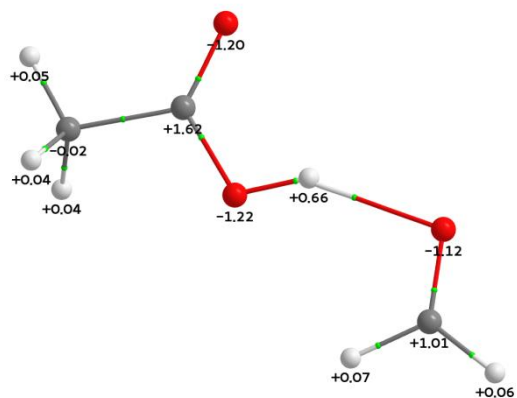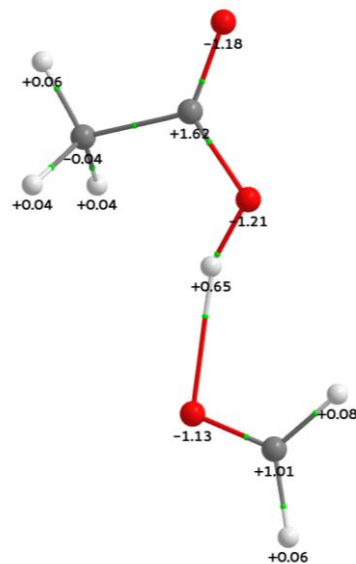 $\text{O}=\text{C}(\text{H})\text{Me}$ 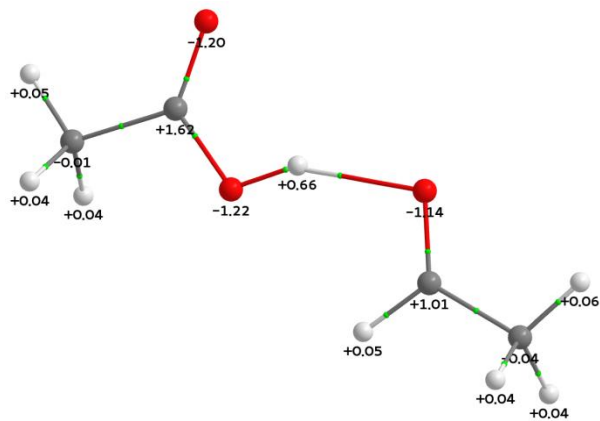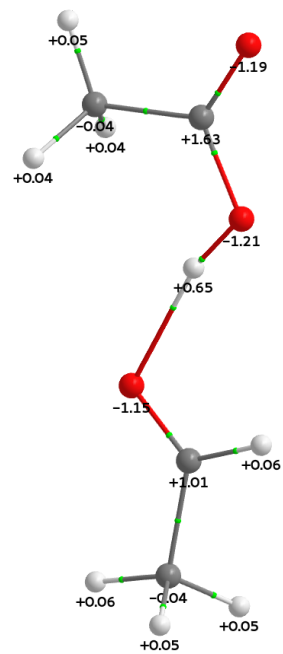

O=CMe<sub>2</sub>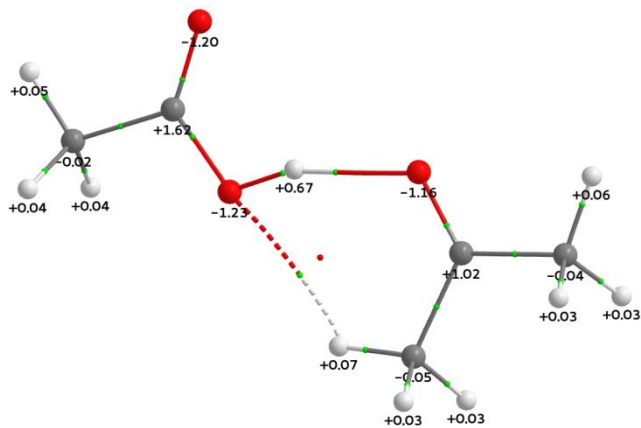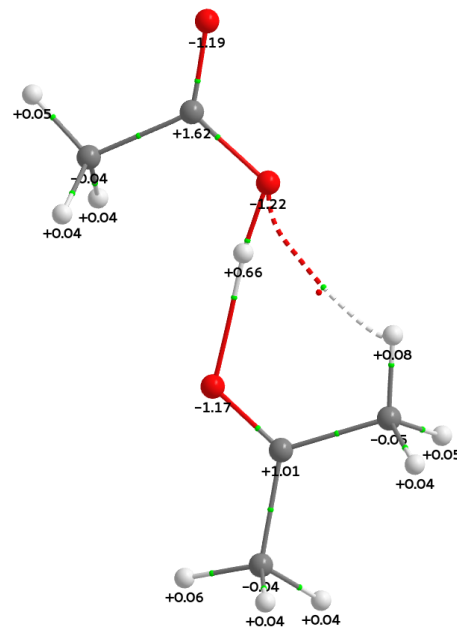BF<sub>4</sub><sup>-</sup>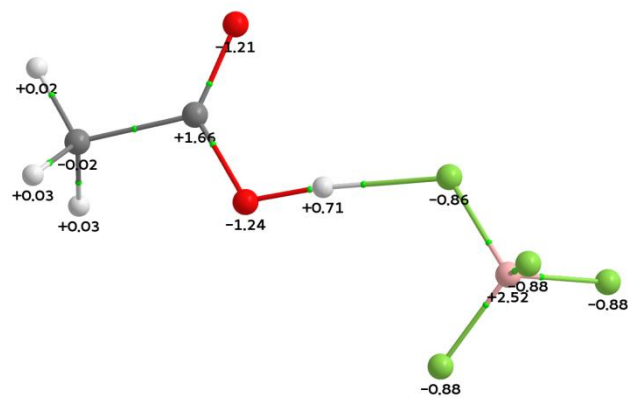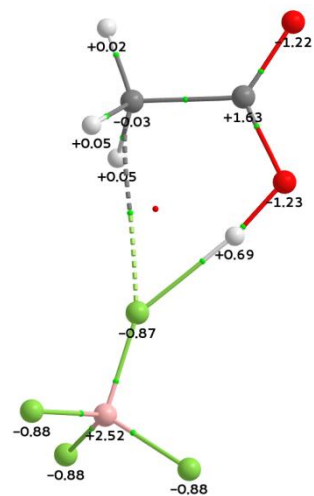NO<sub>3</sub><sup>-</sup>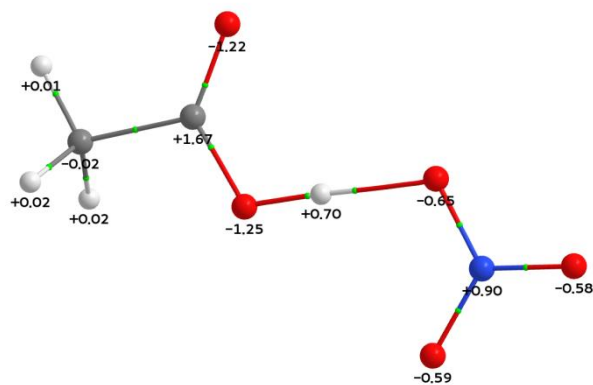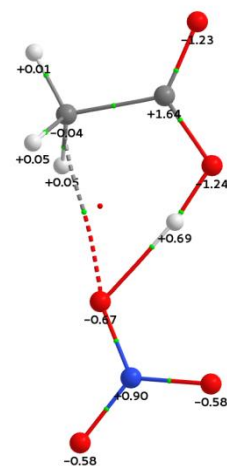

$\text{NCO}^-$ 
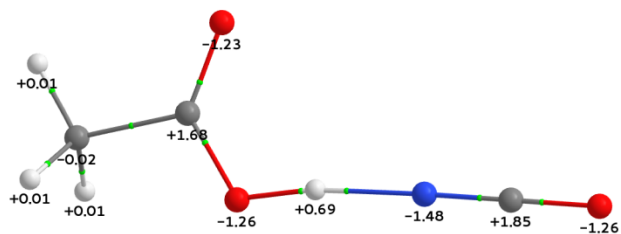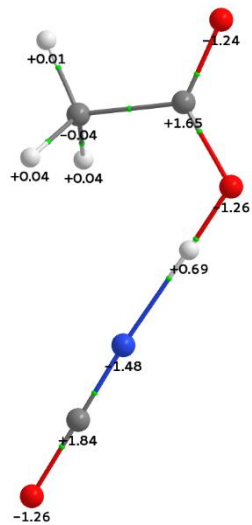
 $\text{N}_3^-$ 
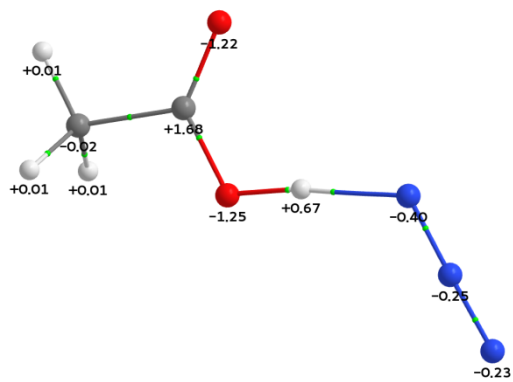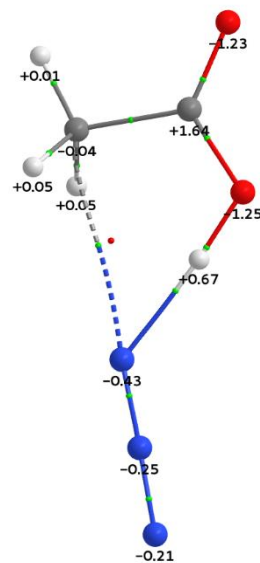
 $\text{N}_3^{-[\text{b}]}$ 
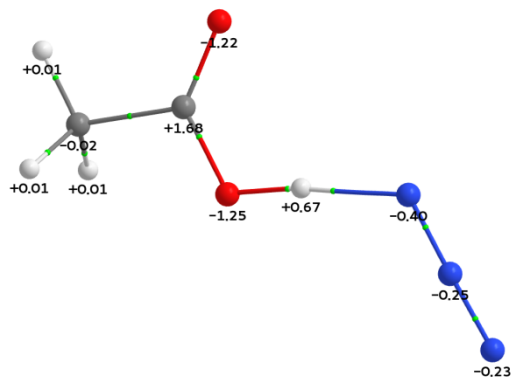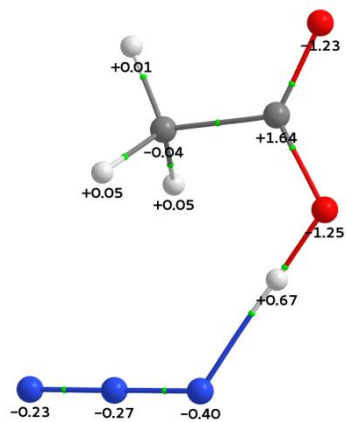

$\text{NO}_3^-$  [b]
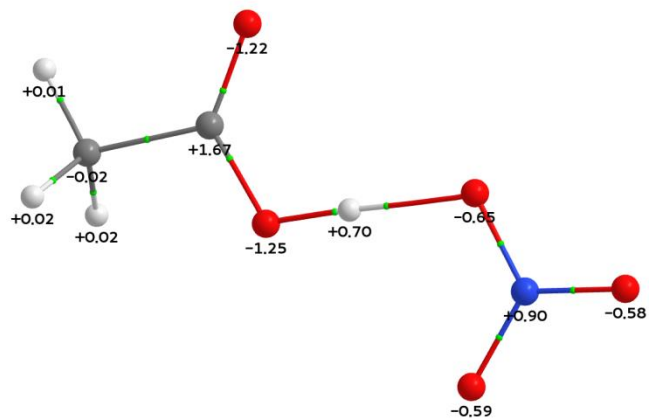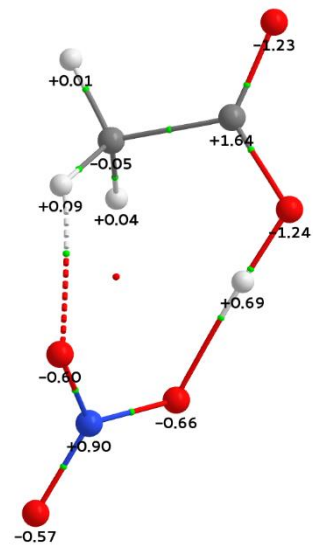
 $\text{Br}^-$ 
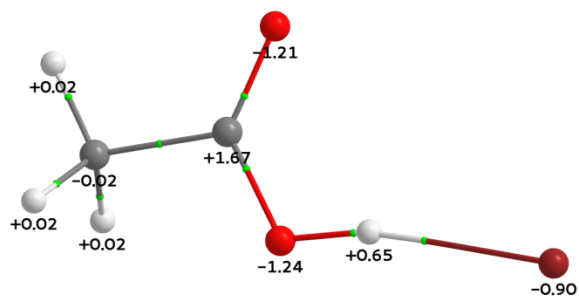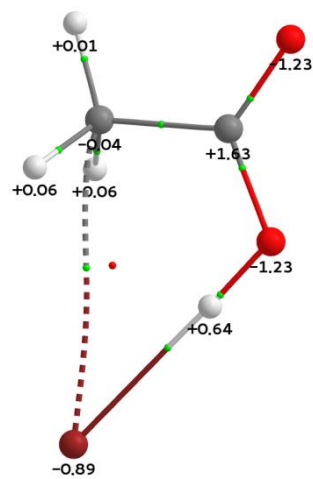
 $\text{Cl}^-$ 
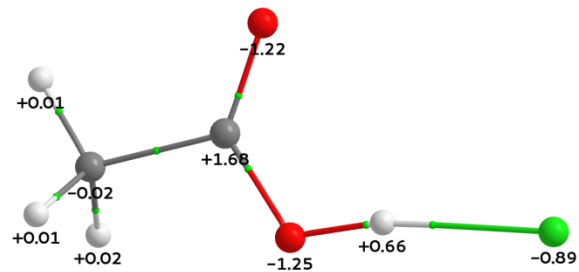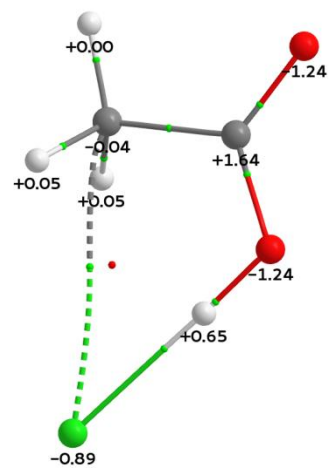



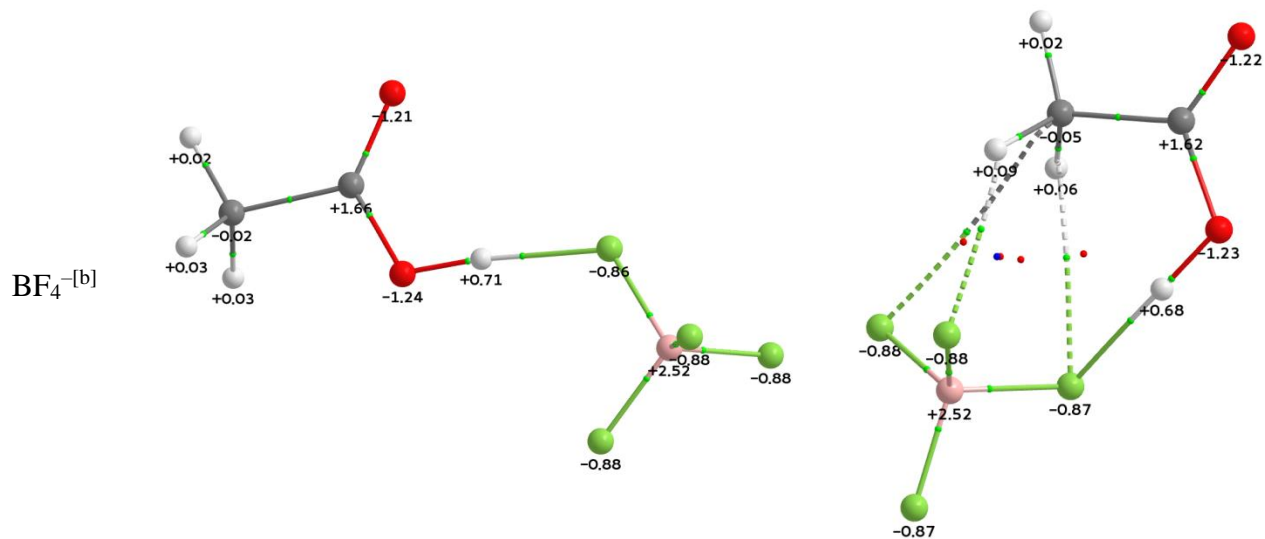

**Figure S5.** Optimized geometries at the M11/aug-cc-pV(T+d)Z level of theory in CPK colors with AIM atomic charges and AIM distribution of critical points (green spheres – BCP, red spheres – RCP, blue spheres – CCP). Adduct pairs are sorted by decrease of conformer energy difference (the same order with the Table 1). [a] Denotes alternative cis conformation, while [b] denotes alternative trans conformation.

## References

- 1 F. H. Allen, *Acta Crystallogr. Sect. B-Struct. Sci.*, 2002, **58**, 380–388.
- 2 R Core Team, *R: A Language and Environment for Statistical Computing*, R Foundation for Statistical Computing, Vienna, Austria, 2015.
- 3 C. F. Macrae, I. J. Bruno, J. A. Chisholm, P. R. Edgington, P. McCabe, E. Pidcock, L. Rodriguez-Monge, R. Taylor, J. van de Streek and P. A. Wood, *J. Appl. Crystallogr.*, 2008, **41**, 466–470.
- 4 R. Peverati and D. G. Truhlar, *J. Phys. Chem. Lett.*, 2011, **2**, 2810–2817.
- 5 T. H. Dunning Jr., K. A. Peterson and A. K. Wilson, *J. Chem. Phys.*, 2001, **114**, 9244–9253.
- 6 R. Peverati and D. G. Truhlar, *Philos. Trans. R. Soc. Lond. Math. Phys. Eng. Sci.*, 2014, **372**, 20120476.
- 7 R. A. Kendall, T. H. D. Jr and R. J. Harrison, *J. Chem. Phys.*, 1992, **96**, 6796–6806.
- 8 D. E. Woon and T. H. D. Jr, *J. Chem. Phys.*, 1993, **98**, 1358–1371.
- 9 A. K. Wilson, D. E. Woon, K. A. Peterson and T. H. D. Jr, *J. Chem. Phys.*, 1999, **110**, 7667–7676.
- 10 S. Yockel and A. K. Wilson, *Theor. Chem. Acc.*, 2007, **120**, 119–131.
- 11 M. W. Schmidt, K. K. Baldridge, J. A. Boatz, S. T. Elbert, M. S. Gordon, J. H. Jensen, S. Koseki, N. Matsunaga, K. A. Nguyen, S. Su, T. L. Windus, M. Dupuis and J. A. Montgomery, *J. Comput. Chem.*, 1993, **14**, 1347–1363.
- 12 M. S. Gordon and M. W. Schmidt, in *Theory and Applications of Computational Chemistry*, eds. G. E. Scuseria, C. E. Dykstra, G. Frenking and K. S. Kim, Elsevier, Amsterdam, 2005, pp. 1167–1189.
- 13 T. A. Keith, *AIMAll (Version 15.05.18, aim.tkgristmill.com)*, TK Gristmill Software, Overland Park KS, USA, 2015.
- 14 K. A. Lyssenko, *Mendeleev Commun.*, 2012, **22**, 1–7.
- 15 E. Espinosa, E. Molins and C. Lecomte, *Chem. Phys. Lett.*, 1998, **285**, 170–173.
- 16 E. Espinosa, C. Lecomte and E. Molins, *Chem. Phys. Lett.*, 1999, **300**, 745–748.
- 17 E. Espinosa and E. Molins, *J. Chem. Phys.*, 2000, **113**, 5686–5694.
- 18 R. F. W. Bader and C. Gatti, *Chem. Phys. Lett.*, 1998, **287**, 233–238.
- 19 E. Espinosa and E. Molins, *J. Chem. Phys.*, 2000, **113**, 5686–5694.

## Data tables

Table S5. Full energy, relevant atomic charges (q), lengths (Å) and QTAIM properties of COOH...X bond ( $E_{cont}$  in kcal·mol<sup>-1</sup> calculated according to the Espinosa-Molins-Lecomte correlation<sup>19</sup>), sum of  $\rho(r)$  and  $E_{cont}$  for all intermolecular bonding (suffix “total”) lengths (Å) and ellipticities of relevant bonds (CC denotes C-CH<sub>3</sub>, CO denotes C=O) and atomic source contributions to the C=O (3,-1) critical point for the M11 calculation results. Prefix “0” denotes values for the *cis* conformer, prefix “180” denotes values for *trans*. Row number denotes the specific cis-trans pair; all data with the same row number should be combined into one row to reproduce the calculations discussed in the manuscript.

|    | Name       | 0 energy   | 0 q H  | 0 q O1  | 0 q C  | 0 q O2  | 0 q CH3 | 0 q total | 0 OH len | 0 CO len | 0 CC len |
|----|------------|------------|--------|---------|--------|---------|---------|-----------|----------|----------|----------|
| 1  | AcOH       | -229.0946  | 0.6242 | -1.1693 | 1.5997 | -1.1953 | 0.1400  | -0.0007   | 0.9651   | 1.1996   | 1.5005   |
| 2  | AcOH+BF4   | -653.7689  | 0.7065 | -1.2390 | 1.6595 | -1.2138 | 0.0520  | -0.9998   | 0.9930   | 1.2076   | 1.5137   |
| 3  | AcOH+BF4   | -653.7689  | 0.7065 | -1.2390 | 1.6595 | -1.2138 | 0.0520  | -0.9998   | 0.9930   | 1.2076   | 1.5137   |
| 4  | AcOH+Br    | -2803.1164 | 0.6539 | -1.2411 | 1.6686 | -1.2144 | 0.0333  | -0.9999   | 1.0107   | 1.2077   | 1.5175   |
| 5  | AcOH+CF4   | -666.6953  | 0.6343 | -1.1762 | 1.6029 | -1.1938 | 0.1408  | 0.0010    | 0.9657   | 1.2013   | 1.5000   |
| 6  | AcOH+Cl    | -689.4038  | 0.6584 | -1.2477 | 1.6760 | -1.2201 | 0.0188  | -1.0004   | 1.0322   | 1.2102   | 1.5204   |
| 7  | AcOH+N3    | -393.3629  | 0.6688 | -1.2520 | 1.6771 | -1.2242 | 0.0178  | -0.9997   | 1.0542   | 1.2123   | 1.5205   |
| 8  | AcOH+N3    | -393.3629  | 0.6688 | -1.2520 | 1.6771 | -1.2242 | 0.0178  | -0.9997   | 1.0542   | 1.2123   | 1.5205   |
| 9  | AcOH+NCH   | -322.5217  | 0.6571 | -1.2069 | 1.6172 | -1.2058 | 0.1168  | -0.0001   | 0.9733   | 1.2036   | 1.5035   |
| 10 | AcOH+NCO   | -397.2709  | 0.6859 | -1.2635 | 1.6821 | -1.2280 | 0.0086  | -0.9998   | 1.0660   | 1.2140   | 1.5221   |
| 11 | AcOH+NO3   | -509.5303  | 0.6982 | -1.2537 | 1.6713 | -1.2224 | 0.0276  | -0.9993   | 1.0295   | 1.2116   | 1.5183   |
| 12 | AcOH+NO3   | -509.5303  | 0.6982 | -1.2537 | 1.6713 | -1.2224 | 0.0276  | -0.9993   | 1.0295   | 1.2116   | 1.5183   |
| 13 | AcOH+OCMe2 | -422.2384  | 0.6713 | -1.2331 | 1.6216 | -1.1977 | 0.1062  | -0.0008   | 0.9817   | 1.2016   | 1.5052   |
| 14 | AcOH+OCMe2 | -422.2429  | 0.6766 | -1.2265 | 1.6269 | -1.2167 | 0.1131  | -0.0005   | 0.9834   | 1.2081   | 1.5041   |
| 15 | AcOH+OH2   | -305.5540  | 0.6719 | -1.2164 | 1.6144 | -1.2133 | 0.1355  | 0.0001    | 0.9822   | 1.2123   | 1.5005   |
| 16 | AcOH+OHCH  | -343.6058  | 0.6598 | -1.2186 | 1.6146 | -1.1954 | 0.1179  | 0.0005    | 0.9762   | 1.2004   | 1.5035   |

|    |            |           |        |         |        |         |        |         |        |        |        |
|----|------------|-----------|--------|---------|--------|---------|--------|---------|--------|--------|--------|
| 17 | AcOH+OHCH  | -343.6126 | 0.6692 | -1.2197 | 1.6203 | -1.2167 | 0.1227 | 0.0000  | 0.9828 | 1.2090 | 1.5025 |
| 18 | AcOH+OHCMe | -382.9234 | 0.6645 | -1.2247 | 1.6184 | -1.1971 | 0.1117 | -0.0002 | 0.9791 | 1.2011 | 1.5044 |
| 19 | AcOH+OHCMe | -382.9301 | 0.6730 | -1.2250 | 1.6237 | -1.2180 | 0.1174 | 0.0005  | 0.9864 | 1.2095 | 1.5032 |
| 20 | AcOH+OMe2  | -384.1205 | 0.6722 | -1.2282 | 1.6199 | -1.2139 | 0.1149 | 0.0003  | 0.9903 | 1.2086 | 1.5037 |
| 21 | AcOH+trz   | -471.3237 | 0.6695 | -1.2331 | 1.6283 | -1.2199 | 0.1071 | -0.0005 | 0.9935 | 1.2100 | 1.5048 |

|    | <b>0 OH ellip</b> | <b>0 CO ellip</b> | <b>0 CC ellip</b> | <b>0 hbond Rho</b> | <b>0 hbond Econt</b> | <b>0 hbond AB length</b> | <b>0 Econt total</b> | <b>0 Rho total</b> | <b>0 sour O5C7</b> | <b>0 sour O6</b> |
|----|-------------------|-------------------|-------------------|--------------------|----------------------|--------------------------|----------------------|--------------------|--------------------|------------------|
| 1  | 0.0118            | 0.0808            | 1.5005            | 0.0000             | 0.0000               | 0.0000                   | 0.0000               | 0.0000             | 90.8306            | 5.2182           |
| 2  | 0.0089            | 0.0747            | 1.5137            | 0.0476             | -16.3854             | 2.6049                   | -16.3854             | 0.0476             | 90.2329            | 5.7639           |
| 3  | 0.0089            | 0.0747            | 1.5137            | 0.0476             | -16.3854             | 2.6049                   | -16.3854             | 0.0476             | 90.2329            | 5.7639           |
| 4  | 0.0084            | 0.0758            | 1.5175            | 0.0371             | -8.3259              | 3.1339                   | -8.3259              | 0.0371             | 90.2135            | 5.7776           |
| 5  | 0.0117            | 0.0786            | 1.5000            | 0.0100             | -2.5360              | 3.1283                   | -2.5360              | 0.0100             | 90.6079            | 5.2796           |
| 6  | 0.0082            | 0.0737            | 1.5204            | 0.0530             | -13.9922             | 2.9149                   | -13.9922             | 0.0530             | 90.0589            | 5.9150           |
| 7  | 0.0083            | 0.0721            | 1.5205            | 0.0762             | -23.4724             | 2.5863                   | -23.4724             | 0.0762             | 89.9600            | 6.0117           |
| 8  | 0.0083            | 0.0721            | 1.5205            | 0.0762             | -23.4724             | 2.5863                   | -23.4724             | 0.0762             | 89.9600            | 6.0117           |
| 9  | 0.0104            | 0.0765            | 1.5035            | 0.0246             | -6.4882              | 2.9408                   | -6.4882              | 0.0246             | 90.5470            | 5.4267           |
| 10 | 0.0084            | 0.0710            | 1.5221            | 0.0843             | -27.0067             | 2.5431                   | -27.0067             | 0.0843             | 89.8509            | 6.1071           |
| 11 | 0.0090            | 0.0721            | 1.5183            | 0.0708             | -23.6019             | 2.5690                   | -23.6019             | 0.0708             | 89.9846            | 5.9677           |
| 12 | 0.0090            | 0.0721            | 1.5183            | 0.0708             | -23.6019             | 2.5690                   | -23.6019             | 0.0708             | 89.9846            | 5.9677           |
| 13 | 0.0108            | 0.0795            | 1.5052            | 0.0352             | -10.1988             | 2.7557                   | -11.7940             | 0.0425             | 90.1953            | 5.6755           |
| 14 | 0.0100            | 0.0701            | 1.5041            | 0.0375             | -11.3426             | 2.7427                   | -14.2303             | 0.0509             | 90.6669            | 5.3598           |
| 15 | 0.0092            | 0.0654            | 1.5005            | 0.0363             | -10.8229             | 2.7243                   | -17.8447             | 0.0633             | 89.9699            | 5.7203           |
| 16 | 0.0113            | 0.0806            | 1.5035            | 0.0287             | -7.7914              | 2.7674                   | -7.7914              | 0.0287             | 90.1404            | 5.6849           |
| 17 | 0.0101            | 0.0684            | 1.5025            | 0.0378             | -11.1993             | 2.7629                   | -14.1382             | 0.0518             | 90.7380            | 5.2835           |
| 18 | 0.0108            | 0.0798            | 1.5044            | 0.0326             | -9.1879              | 2.7456                   | -9.1879              | 0.0326             | 90.1199            | 5.7100           |
| 19 | 0.0100            | 0.0677            | 1.5032            | 0.0414             | -12.4838             | 2.7329                   | -15.3681             | 0.0552             | 90.6901            | 5.3356           |
| 20 | 0.0106            | 0.0681            | 1.5037            | 0.0474             | -14.6823             | 2.6905                   | -18.2945             | 0.0651             | 90.1450            | 5.6515           |
| 21 | 0.0094            | 0.0681            | 1.5048            | 0.0443             | -12.2314             | 2.7729                   | -14.6696             | 0.0562             | 90.0965            | 5.7444           |

|    | <b>180 energy</b> | <b>180 q H</b> | <b>180 q O1</b> | <b>180 q C</b> | <b>180 q O2</b> | <b>180 q CH3</b> | <b>180 q total</b> | <b>180 OH len</b> | <b>180 CO len</b> | <b>180 CC len</b> | <b>180 O H ellip</b> |
|----|-------------------|----------------|-----------------|----------------|-----------------|------------------|--------------------|-------------------|-------------------|-------------------|----------------------|
| 1  | -229.0865         | 0.6084         | -1.1507         | 1.6150         | -1.1717         | 0.0990           | 0.0000             | 0.9604            | 1.1924            | 1.5110            | 0.0126               |
| 2  | -653.7791         | 0.6844         | -1.2269         | 1.6187         | -1.2240         | 0.1168           | -1.0016            | 0.9804            | 1.2073            | 1.5087            | 0.0093               |
| 3  | -653.7741         | 0.6930         | -1.2297         | 1.6301         | -1.2186         | 0.0951           | -0.9996            | 0.9822            | 1.2065            | 1.5122            | 0.0097               |
| 4  | -2803.1262        | 0.6428         | -1.2284         | 1.6306         | -1.2292         | 0.0797           | -0.9984            | 0.9985            | 1.2104            | 1.5115            | 0.0092               |
| 5  | -666.6860         | 0.6175         | -1.1579         | 1.6192         | -1.1732         | 0.0997           | -0.0003            | 0.9607            | 1.1928            | 1.5117            | 0.0124               |
| 6  | -689.4139         | 0.6525         | -1.2379         | 1.6366         | -1.2352         | 0.0709           | -1.0000            | 1.0129            | 1.2129            | 1.5132            | 0.0089               |
| 7  | -393.3707         | 0.6700         | -1.2464         | 1.6426         | -1.2343         | 0.0655           | -1.0001            | 1.0239            | 1.2129            | 1.5154            | 0.0090               |
| 8  | -393.3721         | 0.6683         | -1.2456         | 1.6393         | -1.2337         | 0.0753           | -0.9990            | 1.0205            | 1.2127            | 1.5153            | 0.0091               |
| 9  | -322.5162         | 0.6453         | -1.1953         | 1.6276         | -1.1857         | 0.0855           | 0.0002             | 0.9677            | 1.1966            | 1.5129            | 0.0110               |
| 10 | -397.2784         | 0.6867         | -1.2580         | 1.6486         | -1.2375         | 0.0563           | -1.0001            | 1.0313            | 1.2143            | 1.5170            | 0.0089               |
| 11 | -509.5362         | 0.6892         | -1.2418         | 1.6423         | -1.2290         | 0.0712           | -1.0000            | 1.0072            | 1.2112            | 1.5157            | 0.0097               |
| 12 | -509.5396         | 0.6874         | -1.2450         | 1.6379         | -1.2318         | 0.0803           | -0.9990            | 1.0048            | 1.2108            | 1.5129            | 0.0088               |
| 13 | -422.2361         | 0.6579         | -1.2211         | 1.6248         | -1.1899         | 0.0918           | -0.0014            | 0.9774            | 1.1975            | 1.5128            | 0.0116               |
| 14 | -422.2361         | 0.6579         | -1.2211         | 1.6248         | -1.1899         | 0.0918           | -0.0014            | 0.9774            | 1.1975            | 1.5128            | 0.0116               |
| 15 | -305.5410         | 0.6533         | -1.2065         | 1.6267         | -1.1863         | 0.0883           | 0.0010             | 0.9709            | 1.1969            | 1.5129            | 0.0113               |
| 16 | -343.6016         | 0.6473         | -1.2078         | 1.6236         | -1.1839         | 0.0943           | 0.0002             | 0.9723            | 1.1957            | 1.5121            | 0.0116               |
| 17 | -343.6016         | 0.6473         | -1.2078         | 1.6236         | -1.1839         | 0.0943           | 0.0002             | 0.9723            | 1.1957            | 1.5121            | 0.0116               |
| 18 | -382.9199         | 0.6518         | -1.2125         | 1.6254         | -1.1874         | 0.0914           | 0.0002             | 0.9750            | 1.1968            | 1.5127            | 0.0111               |
| 19 | -382.9199         | 0.6518         | -1.2125         | 1.6254         | -1.1874         | 0.0914           | 0.0002             | 0.9750            | 1.1968            | 1.5127            | 0.0111               |
| 20 | -384.1109         | 0.6603         | -1.2115         | 1.6342         | -1.1865         | 0.0727           | -0.0012            | 0.9756            | 1.1976            | 1.5157            | 0.0115               |
| 21 | -471.3152         | 0.6522         | -1.2172         | 1.6286         | -1.1935         | 0.0843           | -0.0010            | 0.9781            | 1.1990            | 1.5133            | 0.0103               |

|    | <b>180 CO ellip</b> | <b>180 CC ellip</b> | <b>180 hbond Rho</b> | <b>180 hbond Econt</b> | <b>180 hbond AB.length</b> | <b>180 Econt total</b> | <b>180 Rho total</b> | <b>180 sour O5C7</b> | <b>180 sour O6</b> | <b>Remark</b> |
|----|---------------------|---------------------|----------------------|------------------------|----------------------------|------------------------|----------------------|----------------------|--------------------|---------------|
| 1  | 0.0982              | 1.5110              | 0.0000               | 0.0000                 | 0.0000                     | 0.0000                 | 0.0000               | 91.1764              | 4.9599             |               |
| 2  | 0.0763              | 1.5087              | 0.0400               | -13.3278               | 2.6616                     | -19.4175               | 0.0663               | 90.4628              | 5.5760             |               |
| 3  | 0.0775              | 1.5122              | 0.0426               | -14.7564               | 2.6259                     | -17.2360               | 0.0523               | 90.4197              | 5.6232             | 180alt        |
| 4  | 0.0740              | 1.5115              | 0.0343               | -7.6731                | 3.1830                     | -9.4083                | 0.0431               | 90.1990              | 5.7600             |               |
| 5  | 0.0980              | 1.5117              | 0.0091               | -2.3714                | 3.1847                     | -5.6152                | 0.0244               | 91.1467              | 4.9912             |               |
| 6  | 0.0713              | 1.5132              | 0.0472               | -12.2992               | 2.9653                     | -14.3053               | 0.0567               | 90.0747              | 5.8939             |               |
| 7  | 0.0718              | 1.5154              | 0.0636               | -19.1478               | 2.6356                     | -21.4164               | 0.0733               | 90.0865              | 5.9067             |               |
| 8  | 0.0719              | 1.5153              | 0.0614               | -18.3237               | 2.6496                     | -18.3237               | 0.0614               | 90.0549              | 5.9323             | 180alt        |
| 9  | 0.0933              | 1.5129              | 0.0236               | -6.1924                | 2.9710                     | -6.1924                | 0.0236               | 90.9146              | 5.2054             |               |
| 10 | 0.0709              | 1.5170              | 0.0698               | -21.6150               | 2.5979                     | -21.6150               | 0.0698               | 89.9561              | 6.0255             |               |
| 11 | 0.0732              | 1.5157              | 0.0581               | -18.6235               | 2.6207                     | -21.2639               | 0.0682               | 90.1845              | 5.8063             |               |
| 12 | 0.0732              | 1.5129              | 0.0577               | -18.5595               | 2.6215                     | -21.2168               | 0.0704               | 90.1416              | 5.8632             | 180alt        |
| 13 | 0.0917              | 1.5128              | 0.0390               | -11.7531               | 2.7459                     | -13.5113               | 0.0466               | 90.8940              | 5.2140             |               |
| 14 | 0.0917              | 1.5128              | 0.0390               | -11.7531               | 2.7459                     | -13.5113               | 0.0466               | 90.8940              | 5.2140             | Oalt          |
| 15 | 0.0930              | 1.5129              | 0.0312               | -9.1488                | 2.8211                     | -9.1488                | 0.0312               | 90.8988              | 5.2149             |               |
| 16 | 0.0945              | 1.5121              | 0.0336               | -9.7793                | 2.7549                     | -9.7793                | 0.0336               | 90.9890              | 5.1254             |               |
| 17 | 0.0945              | 1.5121              | 0.0336               | -9.7793                | 2.7549                     | -9.7793                | 0.0336               | 90.9890              | 5.1254             | Oalt          |
| 18 | 0.0930              | 1.5127              | 0.0374               | -11.1873               | 2.7455                     | -11.1873               | 0.0374               | 90.9208              | 5.1911             |               |
| 19 | 0.0930              | 1.5127              | 0.0374               | -11.1873               | 2.7455                     | -11.1873               | 0.0374               | 90.9208              | 5.1911             | Oalt          |
| 20 | 0.0931              | 1.5157              | 0.0378               | -11.5016               | 2.7515                     | -11.5016               | 0.0378               | 90.8299              | 5.2863             |               |
| 21 | 0.0903              | 1.5133              | 0.0356               | -9.5022                | 2.8520                     | -10.4695               | 0.0404               | 90.8037              | 5.3113             |               |
